# Supplementary material for: All-inorganic perovskite CsPb(Br/I)3nanorods for optoelectronic application
Source: Royal Society of Chemistry journal article supplement (doi:10.1039/c6nr01828a), 2016-01-01
Supplement: c6nr01828a1.pdf [file c6nr01828a1.pdf]

## Supporting Data

### All-Inorganic Perovskite CsPb(Br/I)<sub>3</sub> nanorods for Optoelectronic Application

Xiaosheng Tang\*,<sup>a</sup> Zhiqiang Zu,<sup>a</sup> Haibing Shao,<sup>a</sup> Wei Hu,<sup>a</sup> Peihua Wangyang,<sup>b</sup> Miao Zhou,<sup>a</sup> Ming Deng,<sup>a</sup> Weiwei Chen,<sup>a</sup> Zhigang Zang,<sup>a</sup> Tao Zhu,<sup>a</sup> Junmin Xue<sup>c</sup>

<sup>a</sup>Key Laboratory of Optoelectronic Technology and Systems of the Education Ministry of China, College of Optoelectronic Engineering, Chongqing University, Chongqing 400044, China

<sup>b</sup>Sichuan Province Key Laboratory of Information Materials and Devices Application, College of Optoelectronic Technology, Chengdu University of Information Technology, Chengdu 610225, China

<sup>c</sup>Department of Materials Science & Engineering, National University of Singapore, Singapore

## Experimental details:

**Chemicals:**  $\text{Cs}_2\text{CO}_3$  (99%, Adamas), octadecene (ODE, 90%, Acros), oleic acid (OA, 90%, Aldrich),  $\text{PbBr}_2$  (99.99%, Xi'an Polymer Light Technology Core),  $\text{PbI}_2$  (99.99% Xi'an Polymer Light Technology Core), oleylamine (OLA, Aldrich, 70%), oleylamine (99.9%, Acros). All chemicals were used as received without further purification.

**Preparation of  $\text{CsPb}(\text{Br/I})_3$  nanorods:** Caesium stock solution was obtained by dissolving 100 mg  $\text{CsCO}_3$  powder in 300  $\mu\text{l}$  oleic acid (OA) and 3.75 ml octadecene (ODE) in a 100 ml three-necked flask, the above stock solution were then heated to 120  $^\circ\text{C}$  under  $\text{N}_2$  for standby. 22 mg  $\text{PbBr}_2$ , 55 mg  $\text{PbI}_2$ , 5 ml ODE were mixed in a 100 ml three-necked flask, which was placed in a heating jacket with the environment of nitrogen and then heated to 120  $^\circ\text{C}$  with magnetic stirring, and then 800  $\mu\text{l}$  OA and 500  $\mu\text{l}$  oleylamine (OLA) were injected into the three-necked flask and then heated to 135  $^\circ\text{C}$  to keep half an hour until the solution turned into bright yellow. Following, extracting 600  $\mu\text{l}$  Caesium stock solution was injected into the precursor solution quickly which containing  $\text{PbBr}_2$  and  $\text{PbI}_2$  when the temperature of the solution was maintained at 135  $^\circ\text{C}$  for 1, 5, 10, 15, 20, 30 minutes until the solution turned to dark red. Finally, the  $\text{CsPb}(\text{Br/I})_3$  nanorods were obtained. The  $\text{CsPb}(\text{Br/I})_3$  nanorods was purified by using toluene to resolve the unreacted OA and OLA, pure  $\text{CsPb}(\text{Br/I})_3$  nanorods were obtained after several purification, and then the  $\text{CsPb}(\text{Br/I})_3$  nanorods were dispersed in toluene for testing.

**Characterization of  $\text{CsPb}(\text{Br/I})_3$  nanorods:** The crystal phases of all samples were characterized by X-ray diffraction (XRD) with CuK $\alpha$  radiation (XRD-6100, SHIMADZU, Japan). The absorption was adopted by a Scan UV-vis spectrophotometer (UV-vis: UV-2100, Shimadzu, Japan). The photoluminescence spectroscopy were measured by a fluorescence spectrophotometer (PL: Agilent Cary Eclipse, Australia) which included a Xe lamp as an excitation source with optical filters). The transmission electron microscopy was tested by a ZEISS LIBRA 200FE microscope. The on/off photocurrent ratio of the  $\text{CsPb}(\text{Br/I})_3$  nanorods was obtained by a source meter (Keithley 4200).

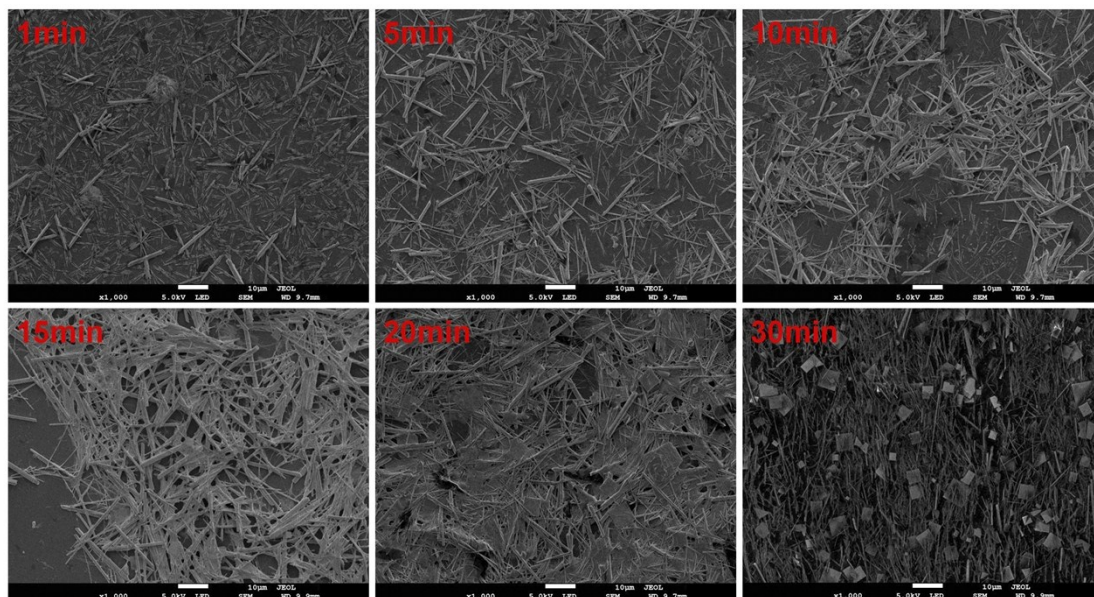

S\_Figure. 1 The synthesis of CsPb(Br/I)<sub>3</sub> nanorods at 135°C for 1, 5, 10, 15, 20, 30 minutes.

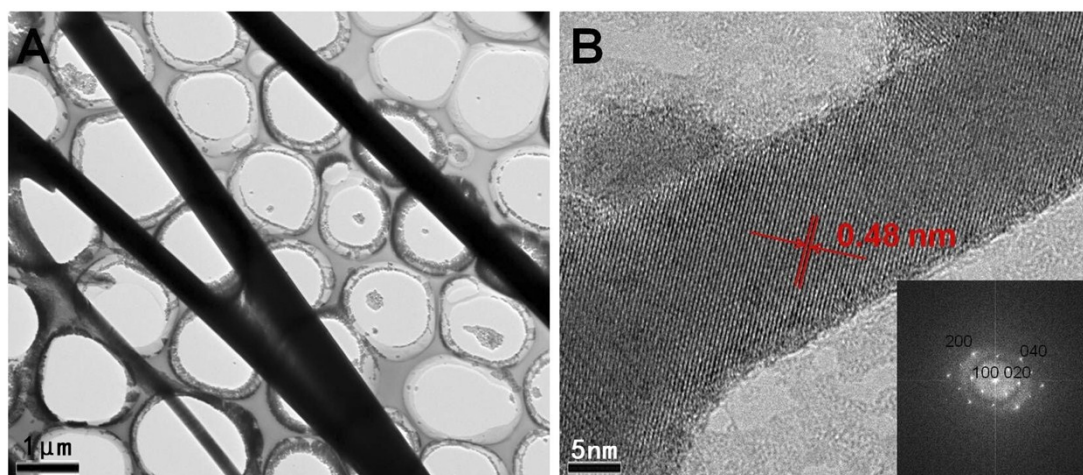

S\_Figure. 2. (A) TEM images of the CsPb(Br/I)<sub>3</sub> nanorods. (B) High resolution TEM image of CsPb(Br/I)<sub>3</sub> nanorods and the SAED of the CsPb(Br/I)<sub>3</sub> nanorods.

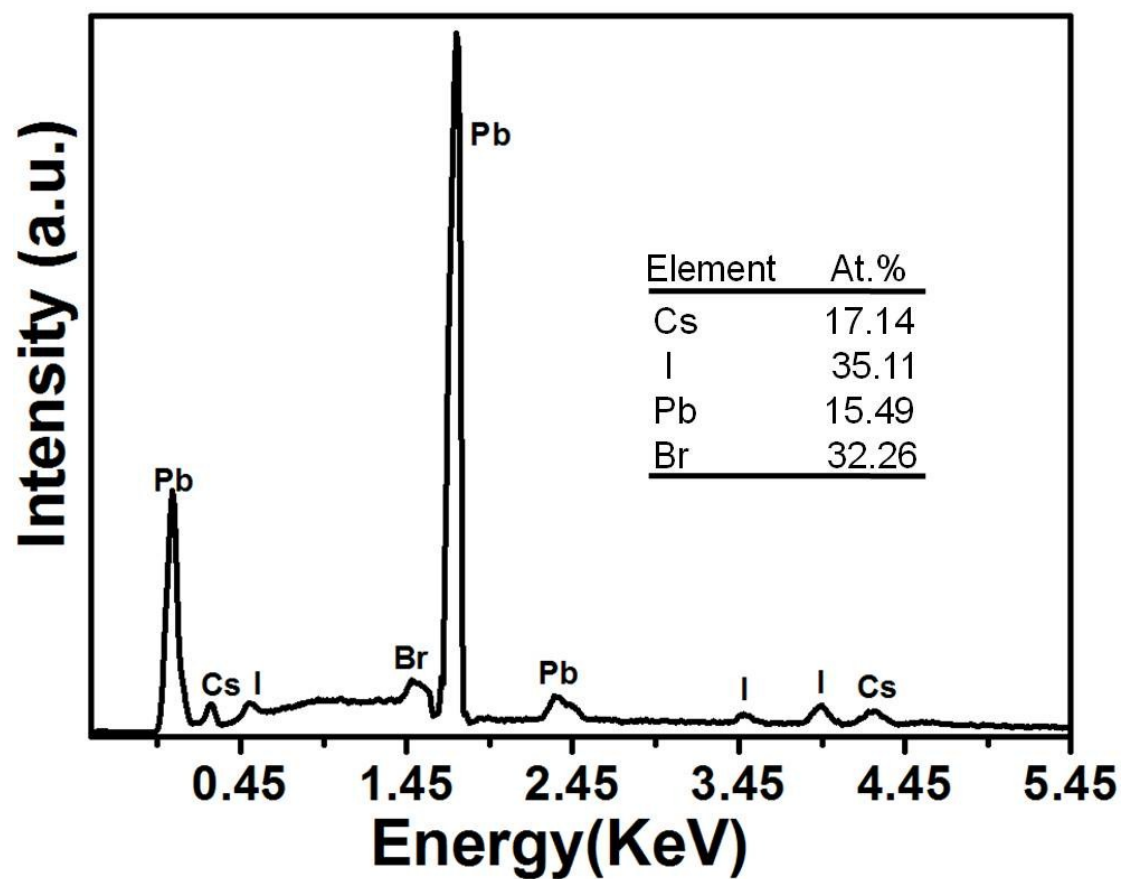

S\_Figure. 3 EDS spectrum of the CsPb(Br/I)<sub>3</sub> nanorods.

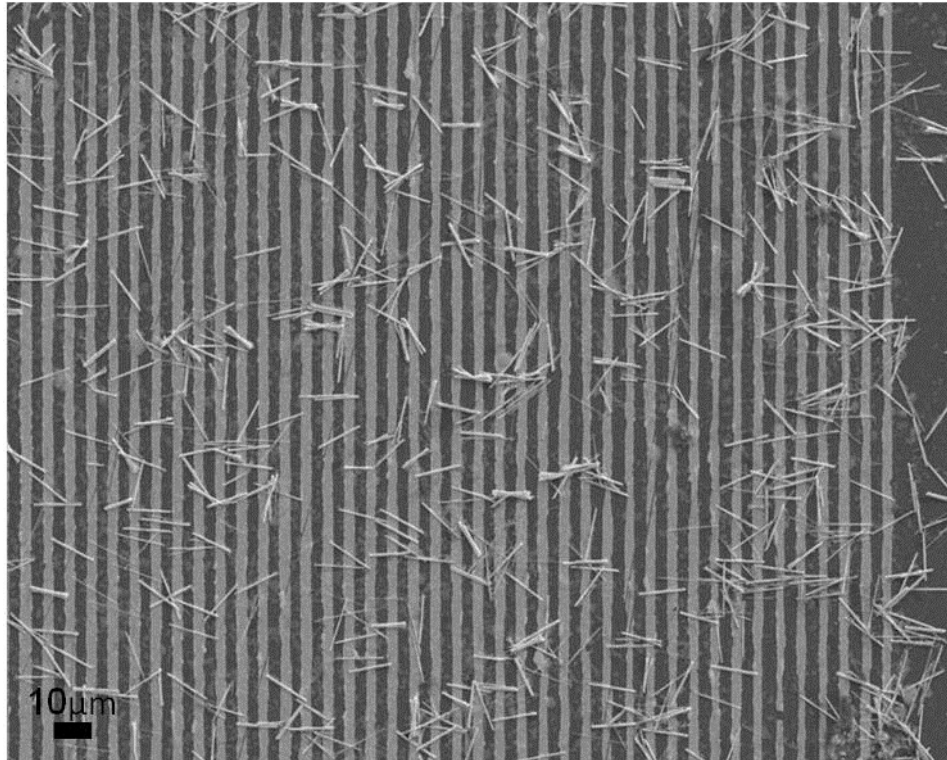

S\_Figure. 4 SEM image of real photodetector device which a great many nanorods which were set up between the two Au electrodes.
